# Supplementary material
Source: HighWire-hosted journal article supplement (https://sit.bmj.com/content/2/1/e000059)
Supplement: inline-supplementary-material-5 [file inline-supplementary-material-5.pdf]

**Supplementary file 3:** Probability (out of 1.00) to have anterior communicating artery complex aneurysms in relation to the degree of right and left asymmetry of A1 ACA. A1ACA = first segment of the anterior cerebral artery, AComA= anterior communicating artery (n=166), without history of aneurysms (n = 115), with the previous history of aneurysm (n = 51).

|                                                     | A1 asymmetry ratio (right and left bigger to smaller A1) | AcomA complex aneurysm |     |       | % Chance | Odds ratio | Chi-squared (Asymptotic Significance); P < |
|-----------------------------------------------------|----------------------------------------------------------|------------------------|-----|-------|----------|------------|--------------------------------------------|
|                                                     |                                                          | No                     | Yes | Total |          |            |                                            |
| Number of cases; n=166                              | Mild to moderate ( $\leq 1.5$ )                          | 130                    | 11  | 141   | 7.8      | 0.02       | 0.0001                                     |
|                                                     | substantial ( $>1.5$ to $\leq 2$ )                       | 3                      | 10  | 13    | 76.9     | 20.95      | 0.0001                                     |
|                                                     | Severe ( $\geq 2$ )                                      | 2                      | 10  | 12    | 83.3     | 31.67      | 0.0001                                     |
|                                                     | substantial to severe ( $>1.5$ )                         | 5                      | 20  | 25    | 80.0     | 47.3       | 0.0001                                     |
|                                                     | <b>Total</b>                                             | 135                    | 31  | 166   |          |            |                                            |
| Number of cases without history of aneurysm (n=115) | Mild to moderate ( $\leq 1.5$ )                          | 93                     | 7   | 100   | 7.0      | 0.027      | 0.0001                                     |
|                                                     | substantial ( $>1.5$ to $\leq 2$ )                       | 2                      | 6   | 8     | 75       | 23.75      | 0.0001                                     |
|                                                     | Severe ( $\geq 2$ )                                      | 2                      | 5   | 7     | 71.4     | 18.26      | 0.0001                                     |
|                                                     | substantial to severe ( $>1.5$ )                         | 4                      | 11  | 15    | 73.3     | 36.53      | 0.0001                                     |
|                                                     | <b>Total</b>                                             | 97                     | 18  | 115   |          |            |                                            |
| Number of cases with history of aneurysm (n=51)     | Mild to moderate ( $\leq 1.5$ )                          | 37                     | 4   | 41    | 9.6      | 0.012      | 0.0001                                     |
|                                                     | substantial ( $>1.5$ to $\leq 2$ )                       | 1                      | 4   | 5     | 20.0     | 16.44      | 0.012                                      |
|                                                     | Severe ( $\geq 2$ )                                      | 0                      | 5   | 5     | 100      | infinite   | 0.001                                      |
|                                                     | substantial to severe ( $>1.5$ )                         | 1                      | 9   | 10    | 90.0     | 83.25      | 0.0001                                     |
|                                                     | <b>Total</b>                                             | 38                     | 13  | 51    |          |            |                                            |
